# Supplementary material for: Characterization of Non-Cholesterol Sterols in Microglia Cell Membranes Using Targeted Mass Spectrometry
Source: MDPI journal article supplement (doi:10.3390/cells12070974), 2023-03-23

## Appendix

### Supplementary Material

**Figure S1. Product Ion Spectra of standards and internal standards.**

#### Standards

##### Brassicasterol

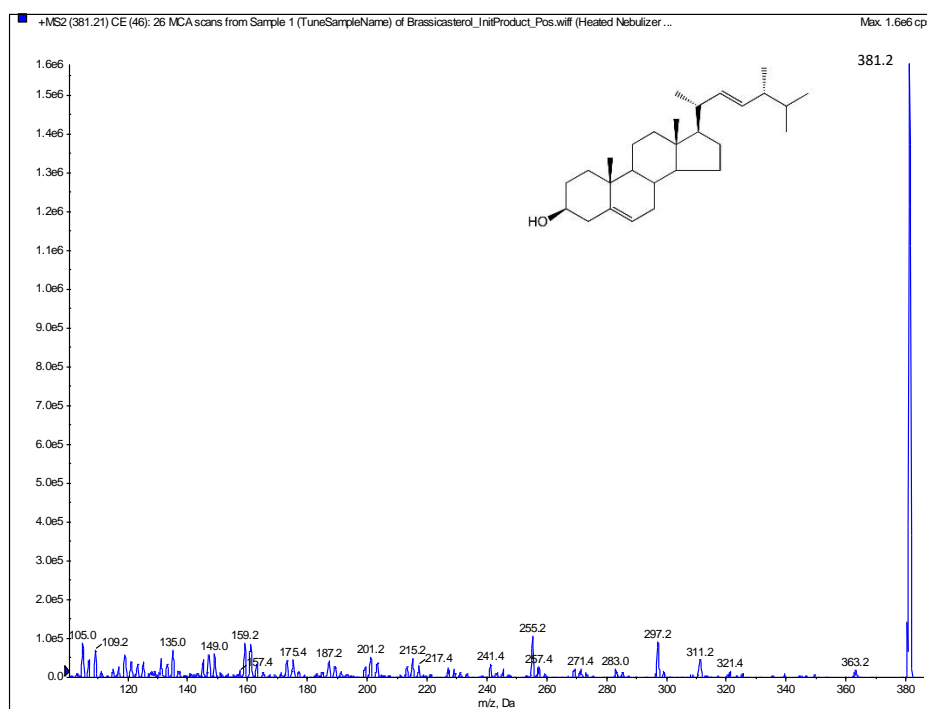

##### Campesterol

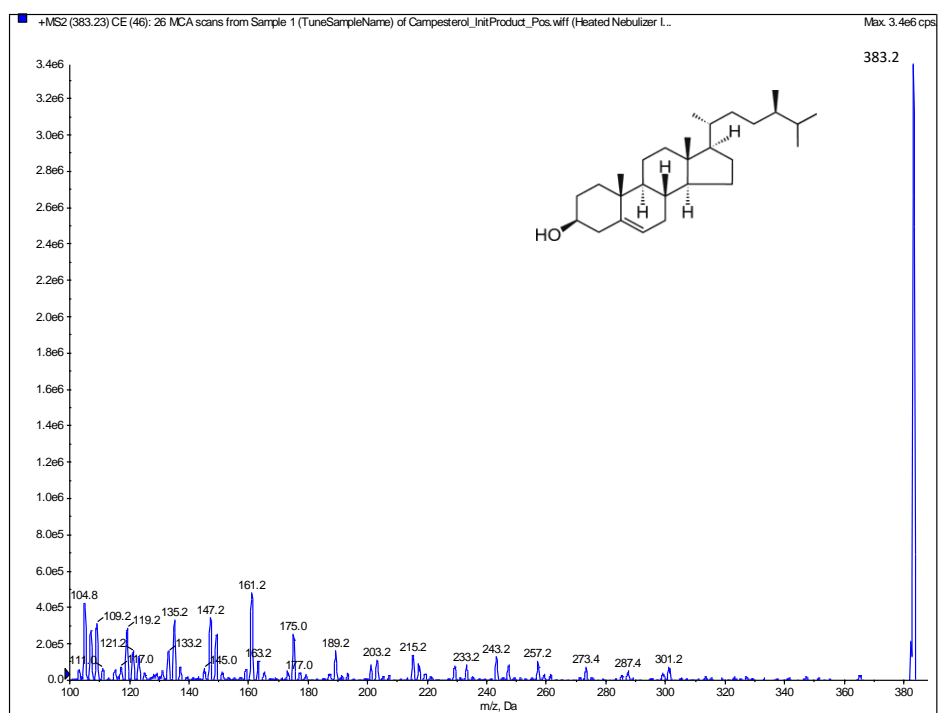

## Stigmasterol

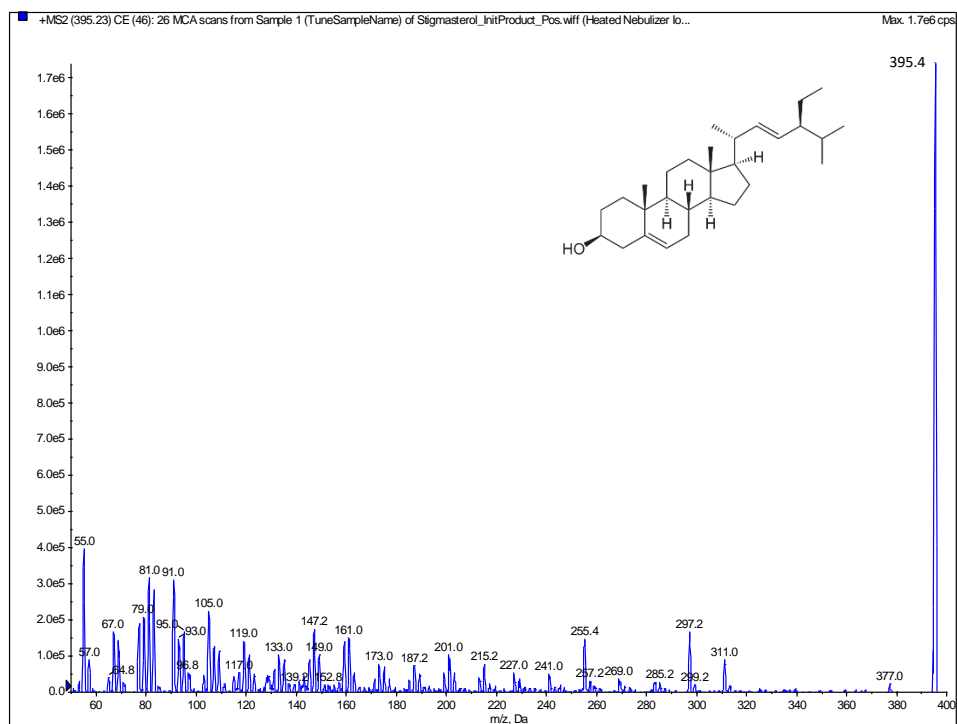

## Sitosterol

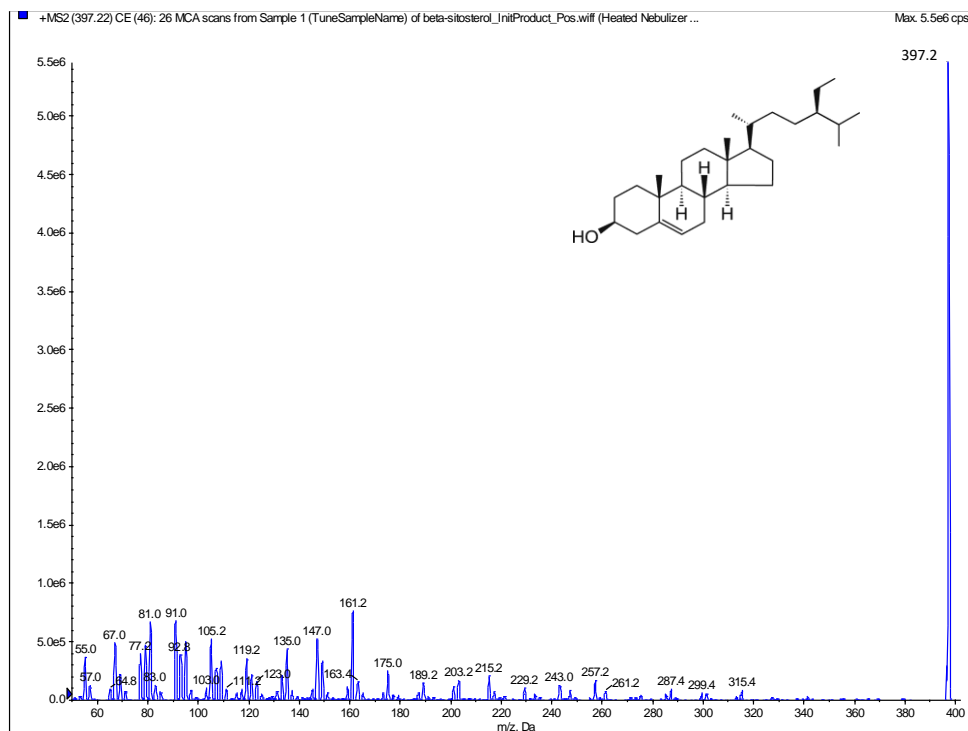

## Lanosterol

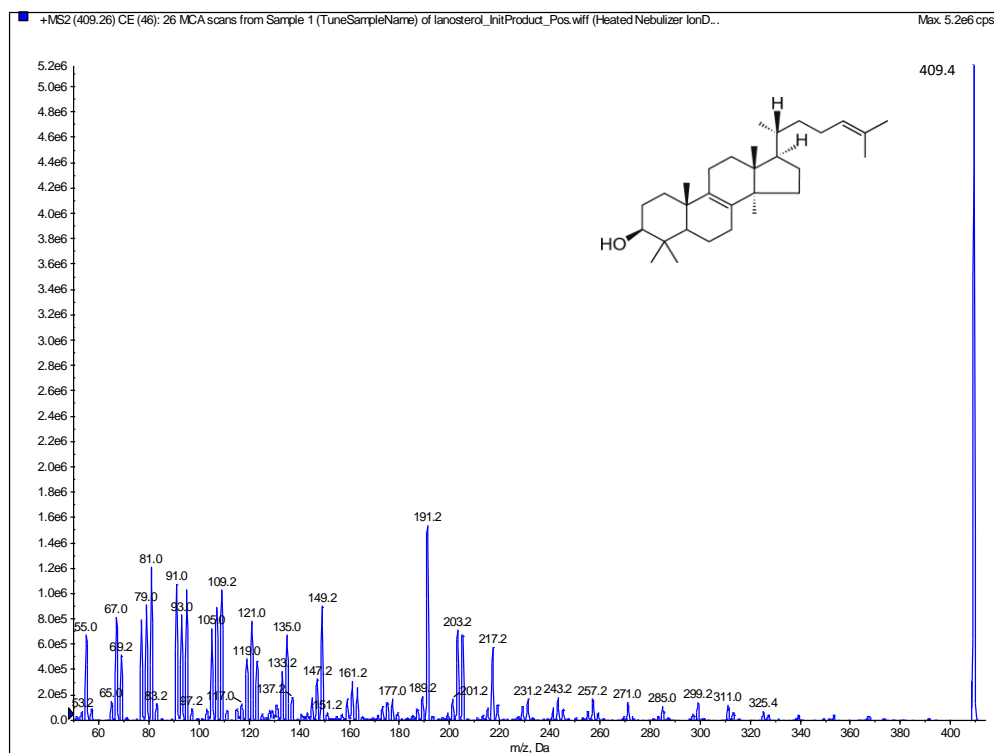

## Desmosterol

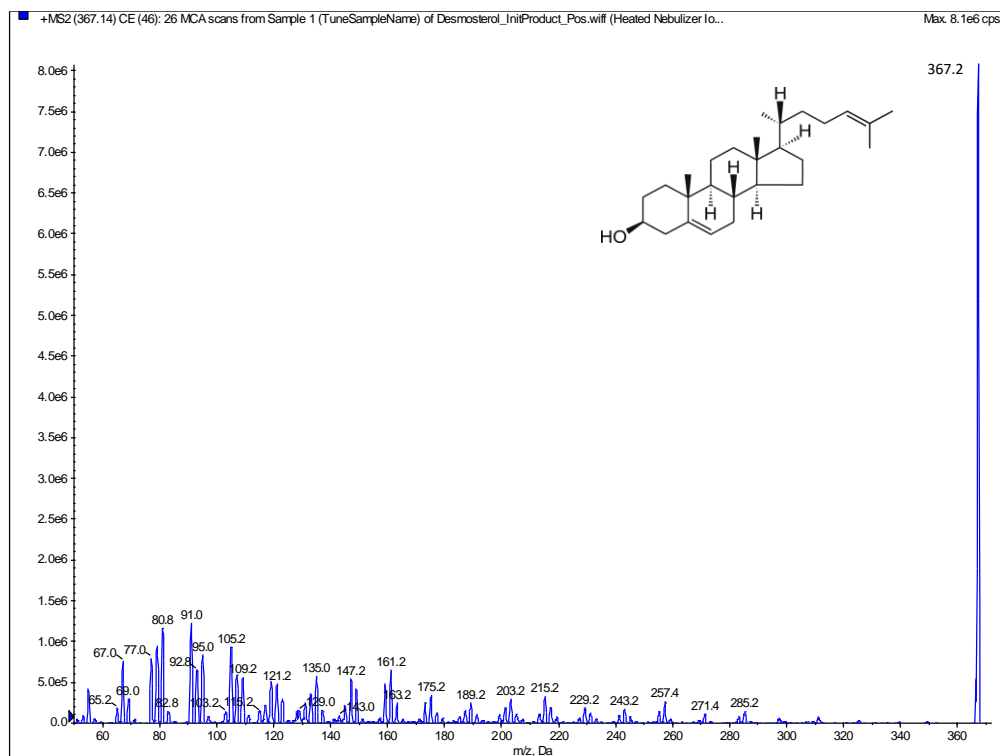

## Cholesterol

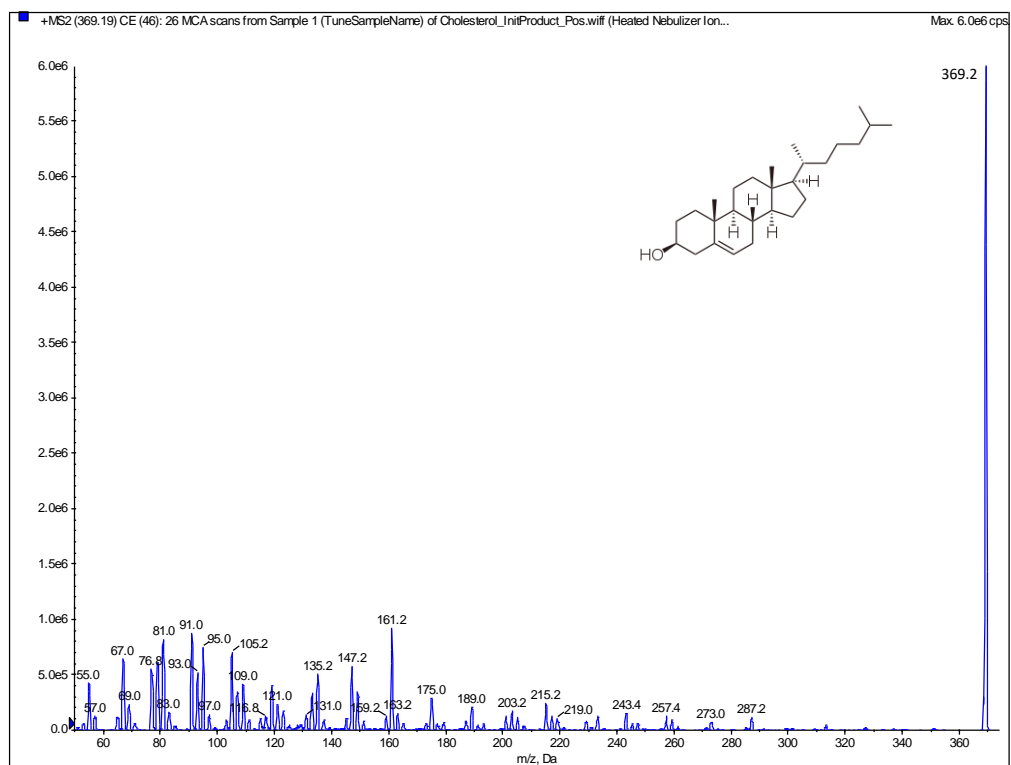

## 7-dehydrocholesterol

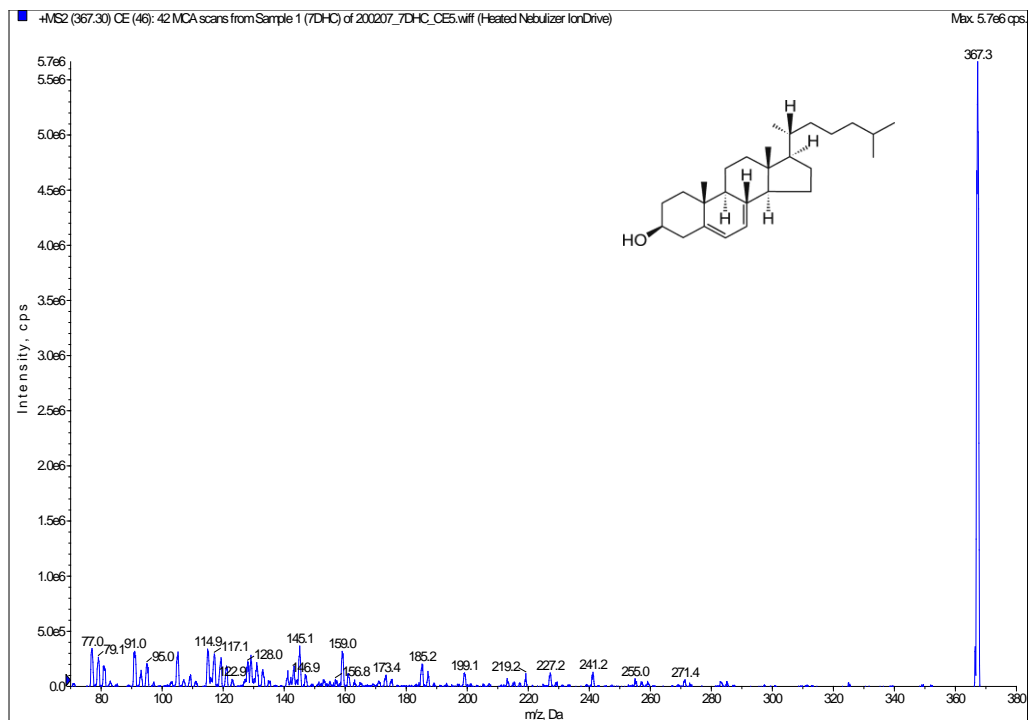

## 4-cholestenone

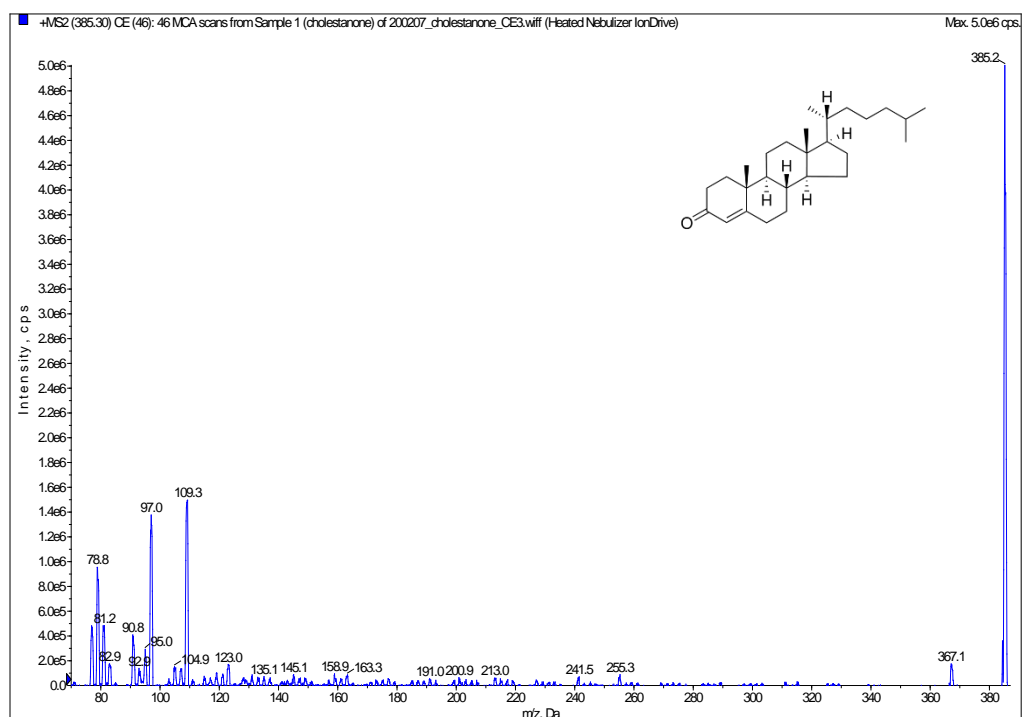

## Internal Standards

### d7-Campesterol

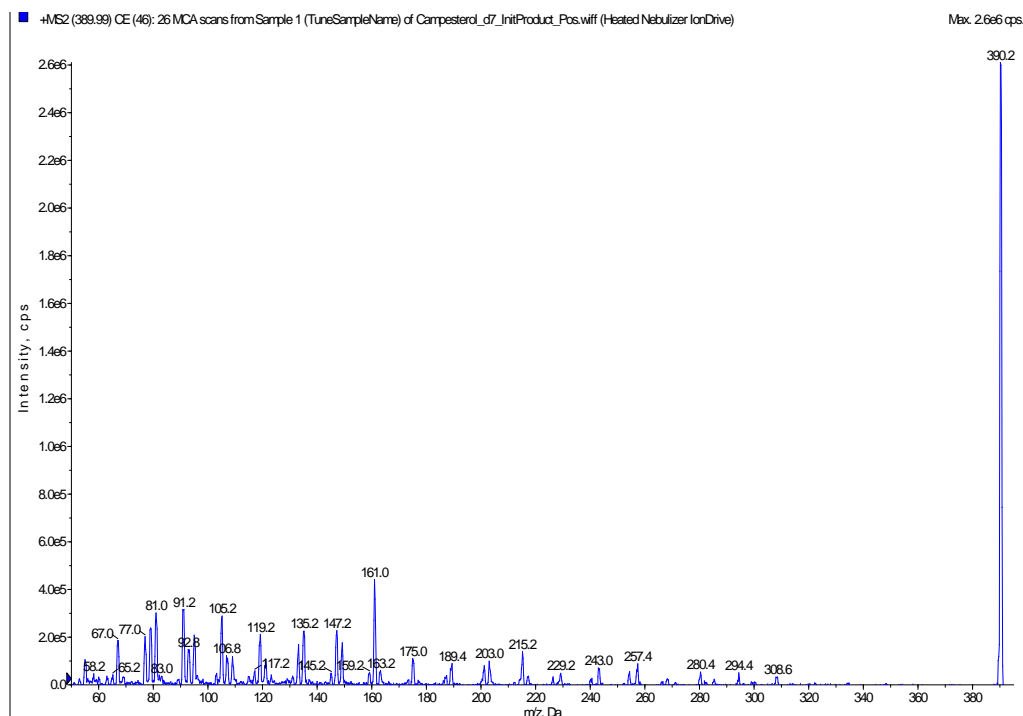

## d7-Sitosterol

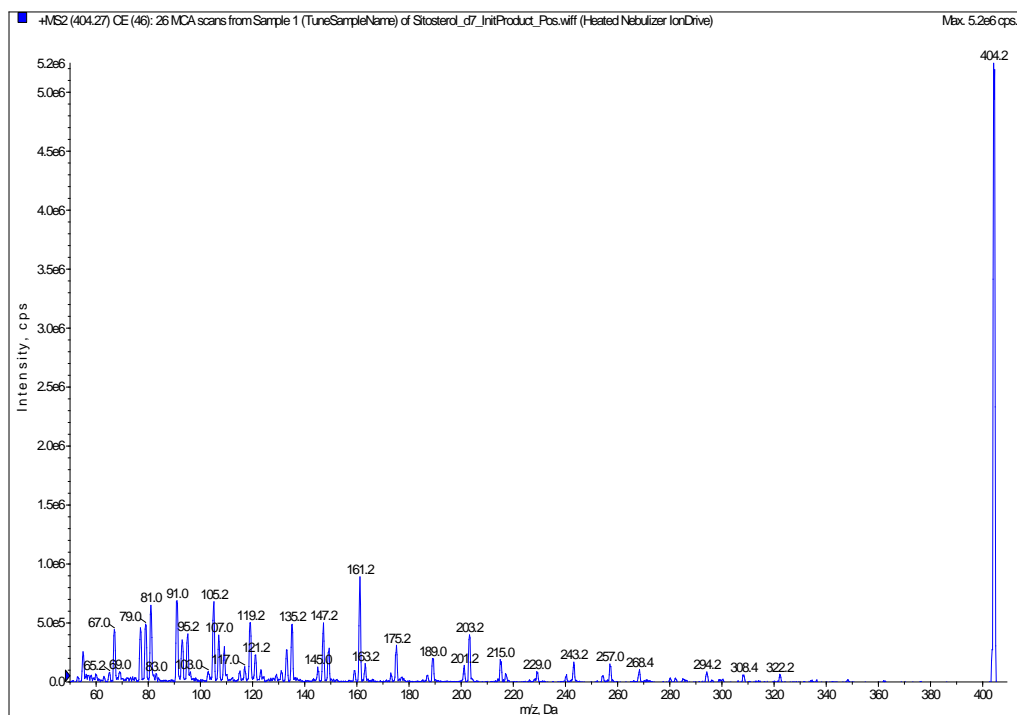

## d7-Cholesterol

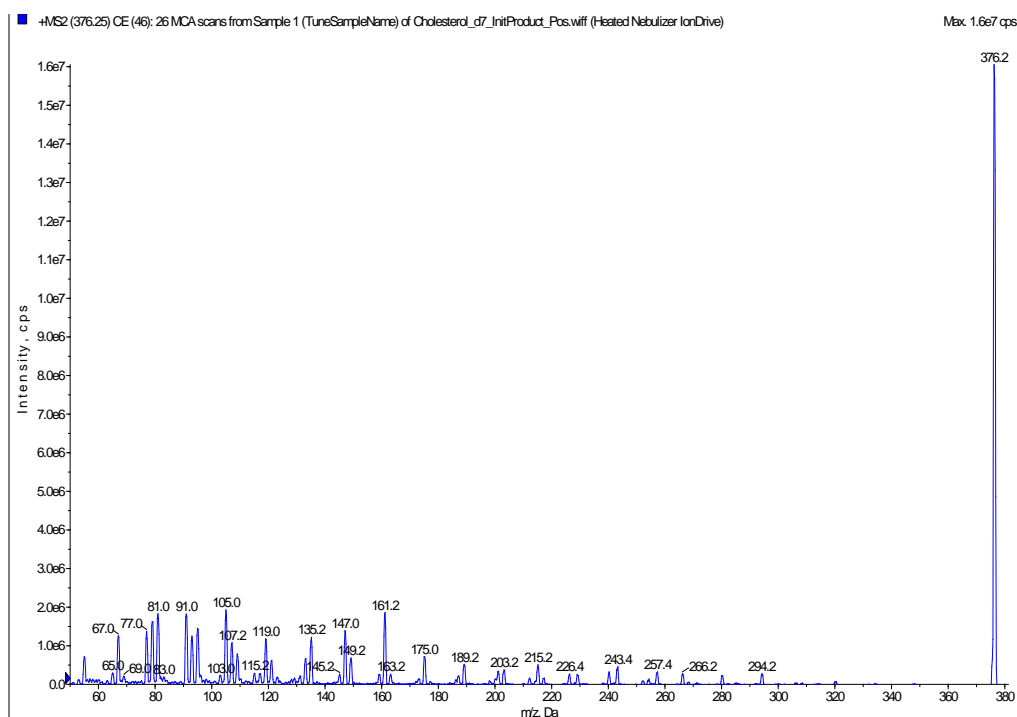

## d5-Stigmasterol

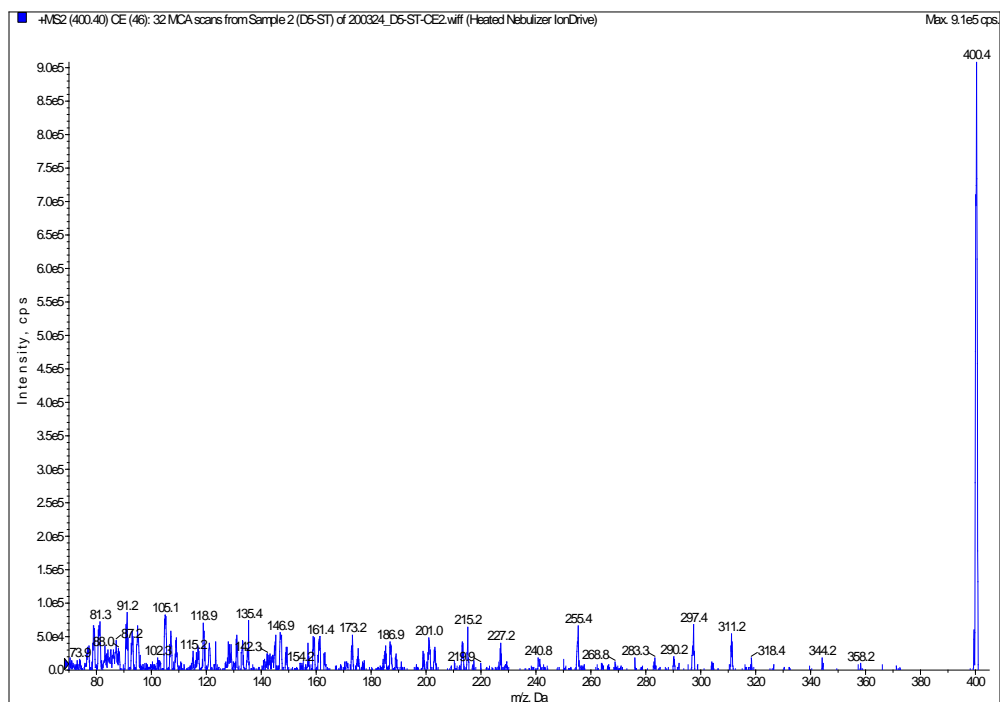

## d6-Desmosterol

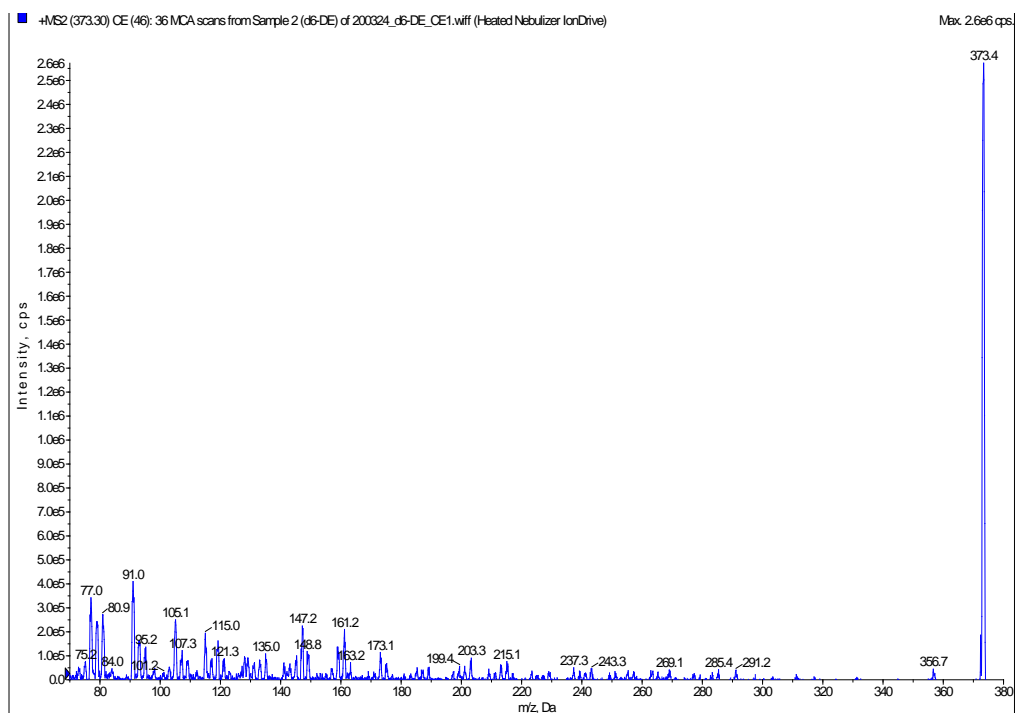

## d6-Lanosterol

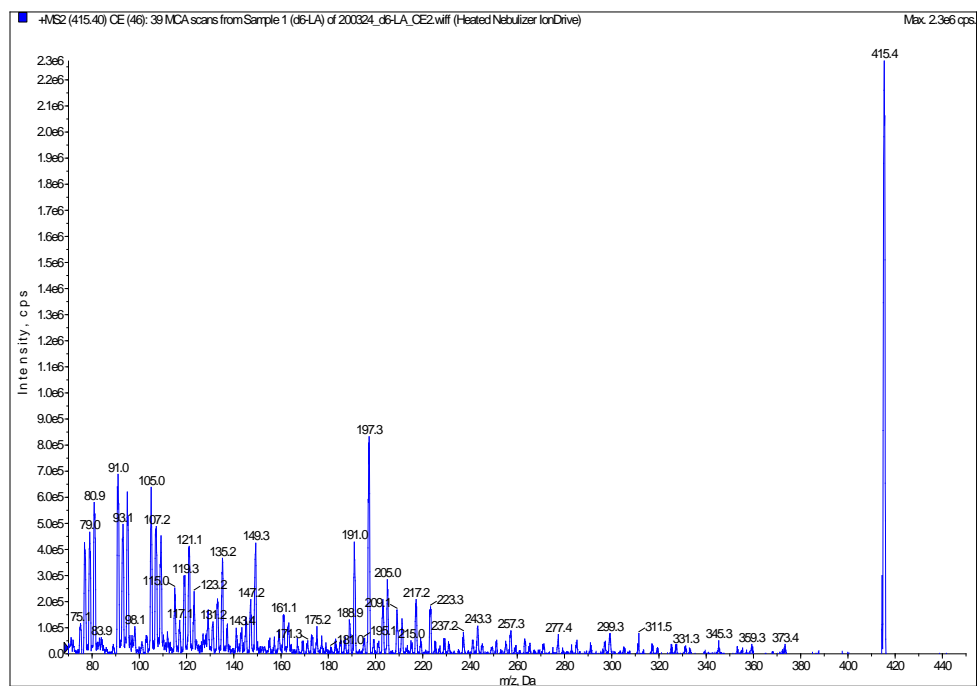

Supplement: s1 [file s1]
