# Supplementary material for: Characterization of Non-Cholesterol Sterols in Microglia Cell Membranes Using Targeted Mass Spectrometry
Source: MDPI journal article supplement (doi:10.3390/cells12070974), 2023-03-23
Supplement: s1 [file s1]

## Appendix

### Supplementary Material

*Article*

# Characterization of Non-Cholesterol Sterols in Microglia Cell Membranes Using Targeted Mass Spectrometry

Ilijana Begcevic Brkovic, Madlen Reinicke, Sorothe Chey, Ingo Bechmann and Uta Ceglarek

Table S1. Sterol compounds and MS method parameters.

Table S2. Retention time of corresponding precursor and fragment ions.

Table S3. Internal standard ion suppression in plasma and cell membrane fractions.

Table S4 Variability of sterol levels between five cell membrane isolations.

Table S5. Calibration range of quantified sterols in cell membranes.

Figure S2. Representative chromatograms of DE and 7-DHC.

Figure S3. Stability of sterols in EDTA-plasma at 10 °C over 48 hours.

Figure S4. Stability of sterols in EDTA-plasma (native and processed) during repeated freeze and thaw cycles.

Figure S5. Internal standard stability stored at -50 °C over time.

Figure S6. Method comparison of the established sterol LC-MS/MS assay with the GC-MS assay.

Figure S7. Campesterol quantitative abundance in membrane microdomain fractions.

Figure S8. Representative chromatograms of sterols in fraction 5.

**Table S1. Sterol compounds and MS method parameters.**

| <b>Sterol compound</b>    | <b>Precursor<br/>(m/z)</b> | <b>Fragment<br/>(m/z)</b> | <b>Dwell<br/>time (ms)</b> | <b>DP (V)</b> | <b>CE (V)</b> | <b>CXP<br/>(V)</b> |
|---------------------------|----------------------------|---------------------------|----------------------------|---------------|---------------|--------------------|
| Brassicasterol            | 381.3                      | 297.1*                    | 30                         | 30            | 23            | 15                 |
| Campesterol               | 383.3                      | 161.2*                    | 20                         | 50            | 31            | 9                  |
|                           |                            | 135.1                     |                            |               | 28            | 10                 |
| Stigmasterol              | 395.3                      | 297.1*                    | 30                         | 30            | 27            | 12                 |
| Sitosterol                | 397.4                      | 161.2*                    | 10                         | 40            | 31            | 10                 |
| Lanosterol                | 409.3                      | 217.3                     | 30                         | 60            | 24            | 16                 |
|                           |                            | 191.1*                    |                            |               | 19            | 15                 |
| Desmosterol               | 367.4                      | 161.2*                    | 20                         | 40            | 26            | 10                 |
| Cholesterol               | 369.3                      | 105.0*                    | 10                         | 60            | 61            | 30                 |
| 7-Dehydrocholesterol      | 367.3                      | 145.1                     | 20                         | 54            | 38            | 20                 |
|                           |                            | 91.0*                     |                            |               | 86            | 18                 |
| 4-Cholestenone            | 385.3                      | 109.3                     | 10                         | 60            | 35            | 14                 |
|                           |                            | 97.0*                     |                            |               | 28            | 10                 |
| <b>Internal standards</b> |                            |                           |                            |               |               |                    |
| d7-Campesterol            | 390.4                      | 161.2                     | 20                         | 50            | 27            | 23                 |
| d7-Sitosterol             | 404.4                      | 161.1                     | 10                         | 35            | 32            | 20                 |
| d7-Cholesterol            | 376.4                      | 147.1                     | 10                         | 50            | 29            | 15                 |
| d5-Stigmasterol           | 404.4                      | 297.3                     | 20                         | 46            | 23            | 10                 |
| d6-Desmosterol            | 373.3                      | 161.3                     | 10                         | 27            | 32            | 8                  |
| d6-Lanosterol             | 415.4                      | 91.0                      | 20                         | 51            | 89            | 11                 |

\*quantifier

DP- declustering potential; CE- collision energy; CXP- collision cell exit potential. Isotope label positions: ST-d5 28-D<sub>2</sub>, 29-D<sub>3</sub>; LA-d6 and DE-d6 26-D<sub>3</sub>, 27-D<sub>3</sub>; CA-d7, SI-d7 and CH-d7 25-D<sub>1</sub>, 26-D<sub>3</sub>, 27-D<sub>3</sub>.

**Table S2. Retention time of corresponding precursor and fragment ions.**

| <b>Sterol compound</b>    | <b>Precursor (m/z)</b> | <b>Fragment (m/z)</b> | <b>RT</b> |
|---------------------------|------------------------|-----------------------|-----------|
| Zymosterol*               | 367.4                  | 161.2                 | 8.63      |
| Desmosterol               | 367.4                  | 161.2                 | 8.92      |
| 7-Dehydrocholesterol      | 367.3                  | 91.0                  | 9.59      |
| Brassicasterol            | 381.3                  | 297.1                 | 9.87      |
| 4-Cholestenone            | 385.3                  | 97                    | 9.88      |
| Cholesterol               | 369.3                  | 105.0                 | 10.00     |
| Lanosterol                | 409.3                  | 191.1                 | 10.08     |
| Stigmasterol              | 395.3                  | 297.1                 | 10.12     |
| Campesterol               | 383.3                  | 161.2                 | 10.15     |
| Sitosterol                | 397.4                  | 161.2                 | 10.25     |
| <b>Internal standards</b> |                        |                       |           |
| d6-Desmosterol            | 373.3                  | 161.3                 | 8.84      |
| d7-Cholesterol            | 376.4                  | 147.1                 | 9.97      |
| d6-Lanosterol             | 415.4                  | 91.0                  | 10.06     |
| d5-Stigmasterol           | 404.4                  | 297.3                 | 10.11     |
| d7-Campesterol            | 390.4                  | 161.2                 | 10.13     |
| d7-Sitosterol             | 404.4                  | 161.1                 | 10.24     |

\*not part of the method, tested for efficient separation from DE

**Table S3. Internal standard ion suppression in plasma and cell membrane fractions.**

| <b>Internal standard</b> | <b>Area* plasma (counts)</b> | <b>Area* calibrator (counts)</b> | <b>IS suppression (%)</b> |
|--------------------------|------------------------------|----------------------------------|---------------------------|
| d7-Campesterol           | 1.407x10 <sup>6</sup>        | 1.580 x10 <sup>6</sup>           | 11.0                      |
| d7-Sitosterol            | 1.193 x10 <sup>6</sup>       | 1.347 x10 <sup>6</sup>           | 11.0                      |
| d7-Cholesterol           | 1.530 x10 <sup>6</sup>       | 1.505 x10 <sup>6</sup>           | 2.0                       |
| d5-Stigmasterol          | 1.113 x10 <sup>5</sup>       | 1.247 x10 <sup>5</sup>           | 11.0                      |
| d6-Desmosterol           | 5.390 x10 <sup>5</sup>       | 5.330 x10 <sup>5</sup>           | 1.0                       |
| d6-Lanosterol            | 4.070 x10 <sup>5</sup>       | 4.52 x10 <sup>5</sup>            | 10.0                      |
| <b>Internal standard</b> | <b>Area# LR (counts)</b>     | <b>Area* calibrator (counts)</b> | <b>IS suppression (%)</b> |
| d7-Campesterol           | 1.516 x10 <sup>6</sup>       | 1.580 x10 <sup>6</sup>           | 4.0                       |
| d7-Sitosterol            | 1.282 x10 <sup>6</sup>       | 1.333 x10 <sup>6</sup>           | 4.0                       |
| d7-Cholesterol           | 1.908 x10 <sup>6</sup>       | 1.870 x10 <sup>6</sup>           | 2.0                       |
| d5-Stigmasterol          | 1.180 x10 <sup>5</sup>       | 1.247 x10 <sup>5</sup>           | 5.0                       |
| d6-Desmosterol           | 5.182 x10 <sup>5</sup>       | 5.377 x10 <sup>5</sup>           | 4.0                       |
| d6-Lanosterol            | 4.438 x10 <sup>5</sup>       | 4.577 x10 <sup>5</sup>           | 3.0                       |

\* expressed as mean, n=2-3

# expressed as mean, n=5. LR- lipid raft fraction with the highest analyte concentration

**Table S4. Variability of sterol levels between five cell membrane isolations.**

| <b>Isolation CV (conc.), n=5</b>      | <b>Cholesterol</b> | <b>Lanosterol</b> | <b>Desmosterol</b> | <b>Sitosterol</b> | <b>Campesterol</b> | <b>Stigmasterol</b> |
|---------------------------------------|--------------------|-------------------|--------------------|-------------------|--------------------|---------------------|
| <b>CV (LF2), %</b>                    | 67.4               | 72.1              | 58.6               | 46.0              | 40.3               | 58.1                |
| <b>CV (LF3), %</b>                    | 53.8               | 62.3              | 48.3               | 47.2              | 44.3               | 30.6                |
| <b>CV (LF4), %</b>                    | 41.8               | 55.2              | 35.5               | 33.5              | 33.2               | 22.0                |
| <b>CV (LF5), %</b>                    | 37.5               | 54.4              | 31.9               | 33.9              | 31.8               | 17.2                |
| <b>CV (LF6), %</b>                    | 39.4               | 57.7              | 33.2               | 34.9              | 33.0               | 19.5                |
| <b>CV (LF7), %</b>                    | 31.0               | 32.0              | 32.6               | 29.5              | 22.4               | 38.1                |
| <b>Isolation CV (sterols/CH), n=5</b> |                    |                   |                    |                   |                    |                     |
| <b>CV (LF2), %</b>                    | NA                 | 17.4              | 27.2               | 83.1              | 99.2               | 66.0                |
| <b>CV (LF3), %</b>                    | NA                 | 21.9              | 15.0               | 22.9              | 36.2               | 55.8                |
| <b>CV (LF4), %</b>                    | NA                 | 23.9              | 13.5               | 11.9              | 11.7               | 28.7                |
| <b>CV (LF5), %</b>                    | NA                 | 24.1              | 12.6               | 5.6               | 7.3                | 26.0                |
| <b>CV (LF6), %</b>                    | NA                 | 29.1              | 10.1               | 9.0               | 10.4               | 22.7                |
| <b>CV (LF7), %</b>                    | NA                 | 29.1              | 12.4               | 11.4              | 11.7               | 25.0                |

LF- lipid rafts fraction; CH- cholesterol

**Table S5. Calibration range of quantified sterols in cell membranes.**

| <b>Sterol</b> | <b>Calibration range (mg/L)</b> | <b>Linear range equation*</b> | <b>R2</b> |
|---------------|---------------------------------|-------------------------------|-----------|
| Campesterol   | 0.05-50                         | $y = 0.431x - 0.00731$        | 0.9976    |
| Stigmasterol  | 0.1-50                          | $y = 0.734x - 0.0157$         | 0.9978    |
| Sitosterol    | 0.05-50                         | $y = 0.409x - 0.00511$        | 0.9976    |
| Lanosterol    | 0.05-50                         | $y = 0.809x - 0.0103$         | 0.9982    |
| Desmosterol   | 0.05-50                         | $y = 1.08x - 0.017$           | 0.9991    |

\* assessed based on n=3 calibration curves.

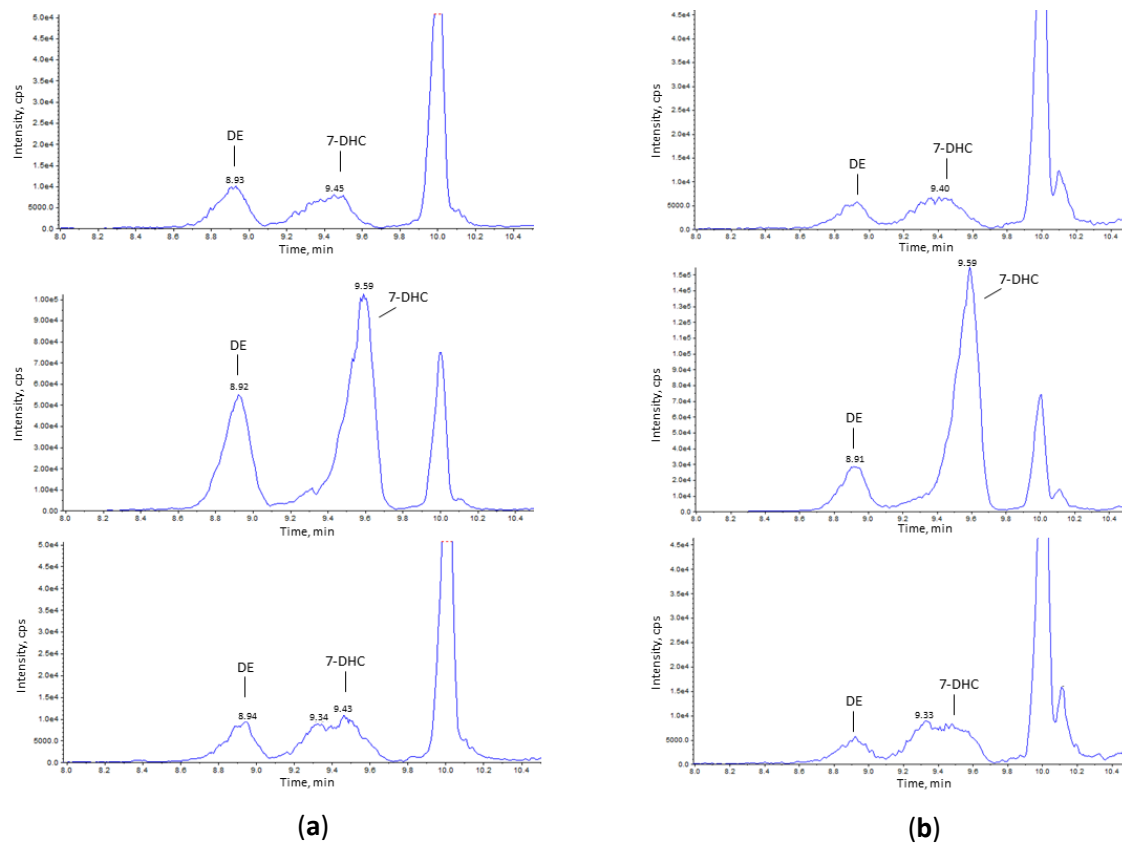

**Figure S2. Representative chromatograms of DE and 7-DHC.** (a) Plasma chromatogram when DE precursor/transition is selected ( $m/z$ : 367.4/161.2). (b) Plasma chromatogram when 7-DHC precursor/transition is selected ( $m/z$ : 367.3/91). Upper graphs- pooled plasma sample (QC); middle graphs- DE and 7-DHC spiked pooled plasma; lower graphs- pooled plasma before spikes.

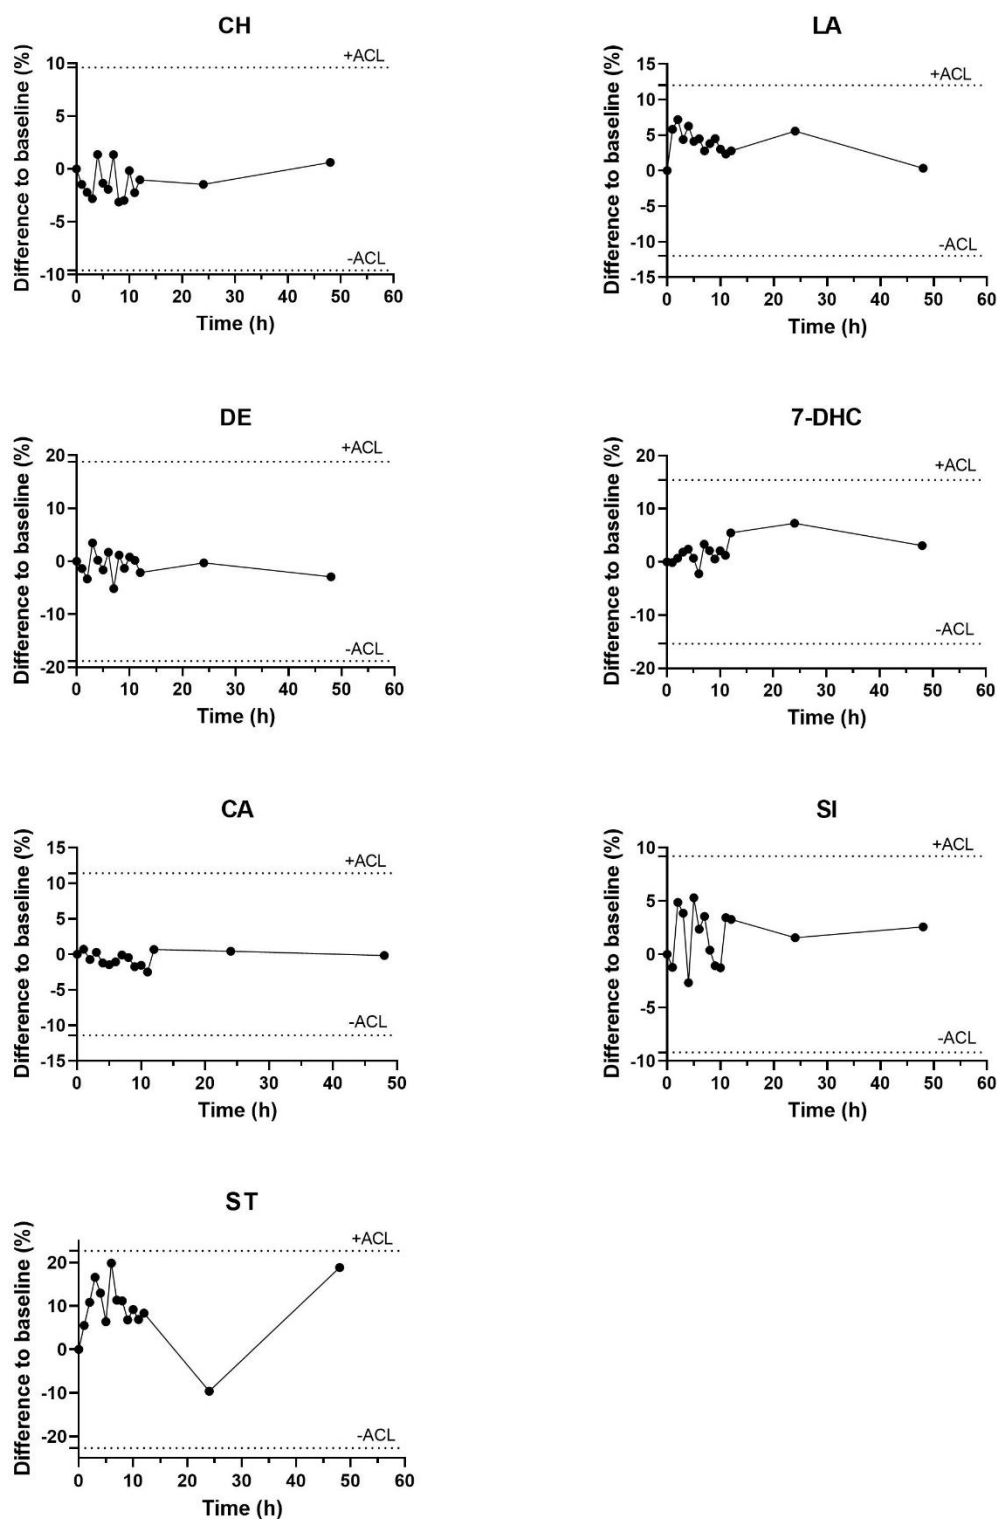

**Figure S3. Stability of sterols in EDTA-plasma at 10 °C over 48 hours.** Stability was assessed in the plasma pool samples (n=3) every hour for 12 hours, after 24 and after 48 hours. Result for every time point is presented as a percentage difference to the mean baseline value (T=0). Acceptable change limit (ACL) was figured as dashed line.



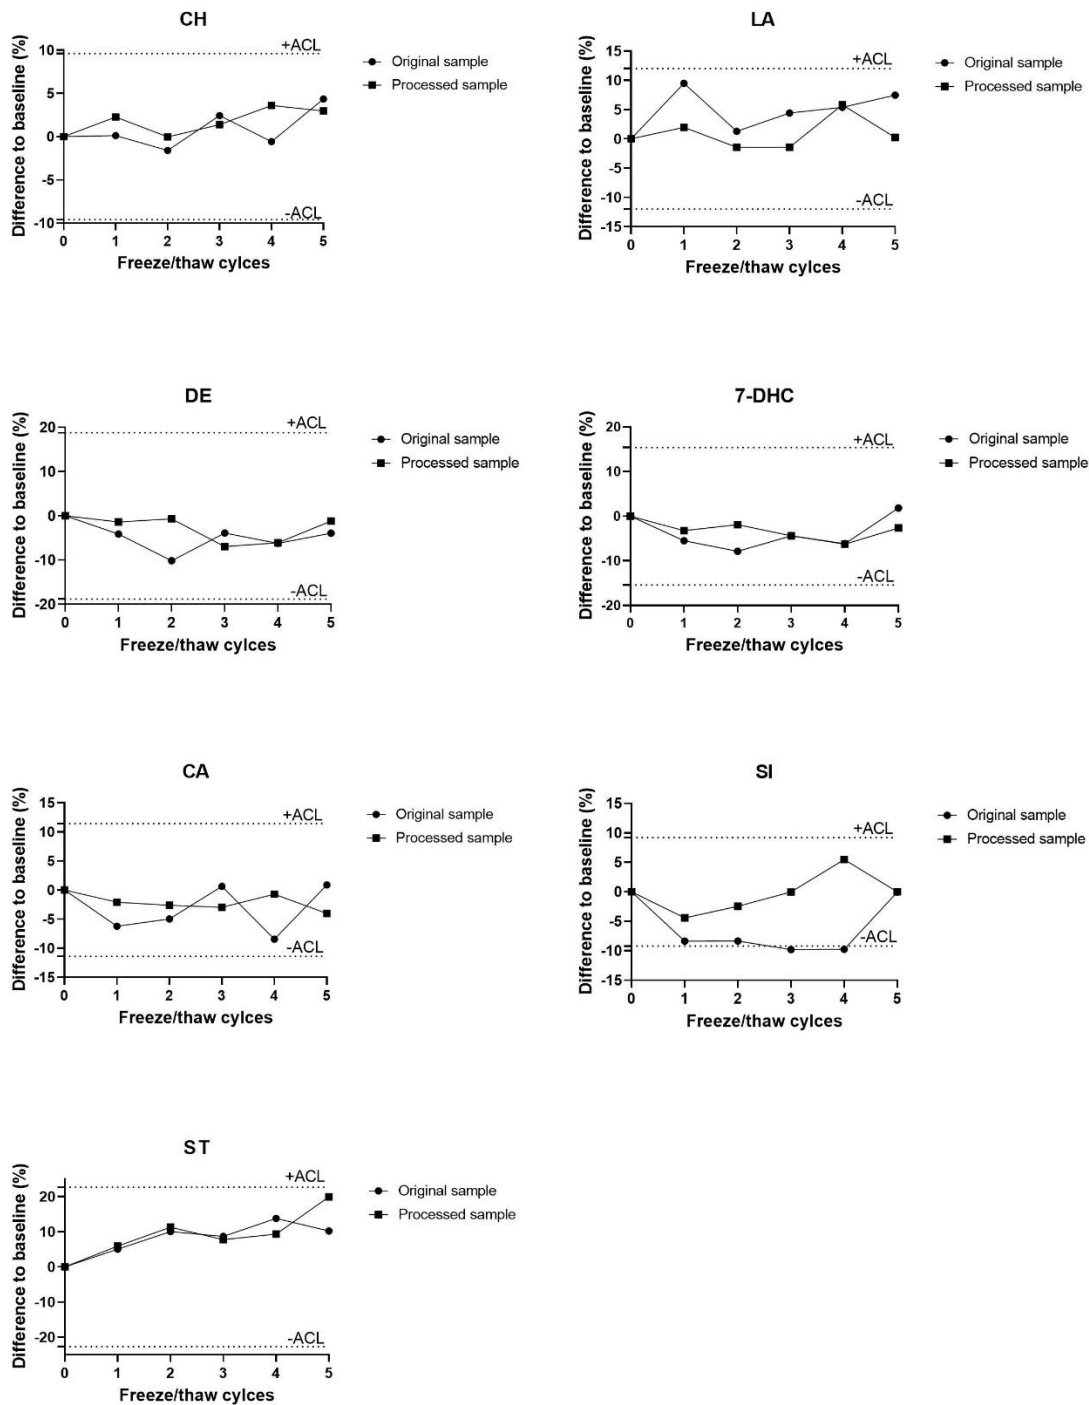

**Figure S4. Stability of sterols in EDTA-plasma (native and processed) during repeated freeze and thaw cycles.** Once frozen and thawed original plasma pool samples (n=3, T=0) and processed samples (n=3) were subjected for additional 5 cycles of freeze and thaw. Result for every time point is presented as a percentage difference to the mean (n=3) baseline value (T=0). Acceptable change limit is figured as dashed line.

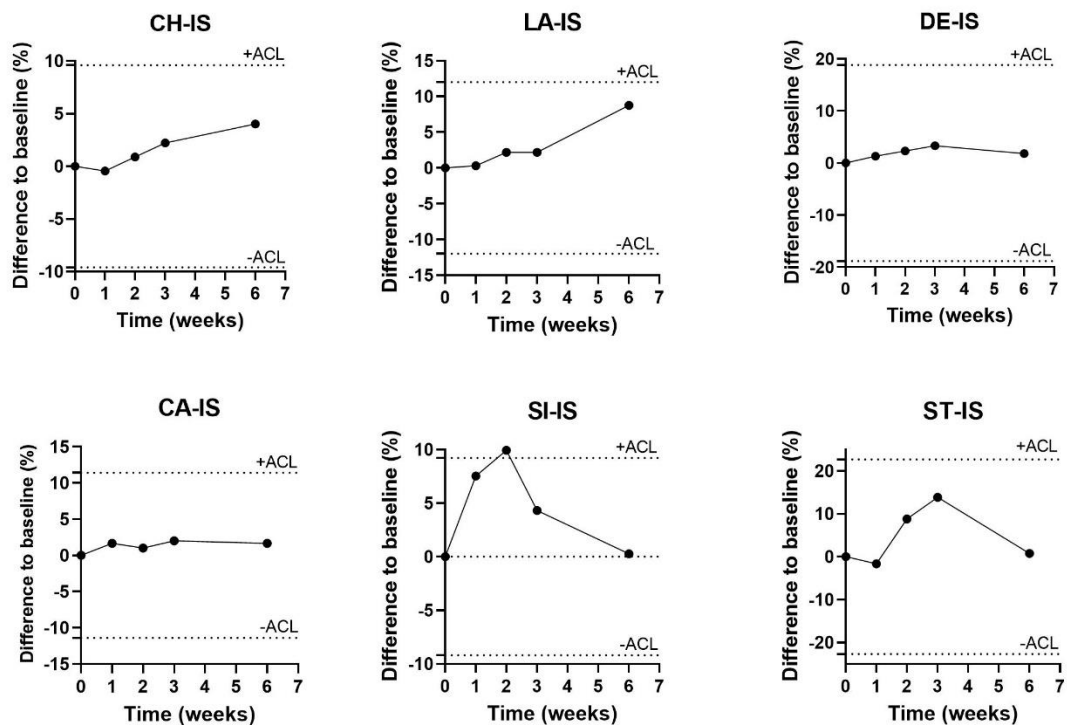

**Figure S5. Internal standard stability stored at -50 °C over time.** Stability of the internal standard working solution was assessed with a plasma pool sample (n=1) prepared after one, two, three and six weeks after initial preparation (T=0). Result for every time point is presented as a percentage difference to the mean (n=3) baseline value (T=0). Acceptable change limit (ACL) is figured as dashed line.

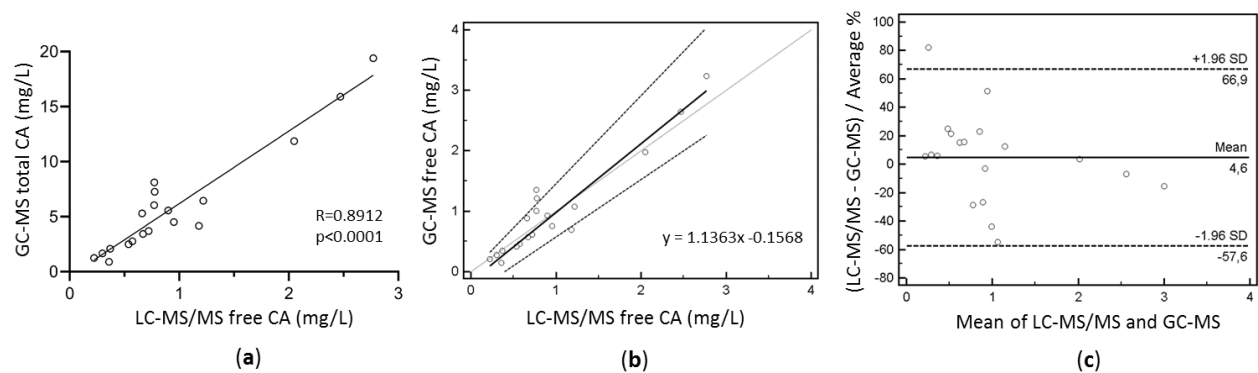

**Figure S6. Method comparison of the established sterol LC-MS/MS assay with the GC-MS assay.** Comparison was performed using human samples ( $n=19$ ) and analyzing CA with both methods; (a) Spearman correlation between total (GC-MS) and free CA (LC-MS/MS) levels; (b) Passing-Bablok regression between estimated free CA with GC-MS and free CA by LC-MS/MS (95% CI of the slope 0.9480-1.4564 and intercept -0.3728-(-0.001466)); (c) Bland-Altman plot of estimated mean difference and standard deviations (SD) of CA levels between the two methods (total CA concentration).

(a)

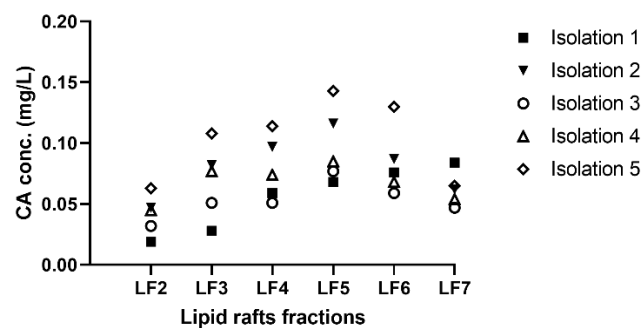

(b)

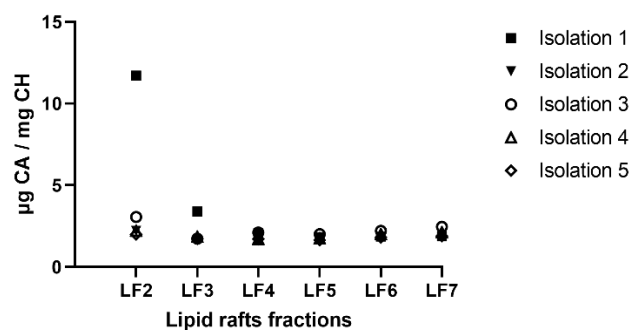

**Figure S7. Campesterol quantitative abundance in membrane microdomain fractions.** (a) Campesterol (CA) concentrations in lipid rafts fractions (LF) 2-7 in five consecutive isolation, expressed as mg/L; (b) CA concentration in the same fractions normalized by cholesterol (CH) levels, expressed as µg CA/mg CH.

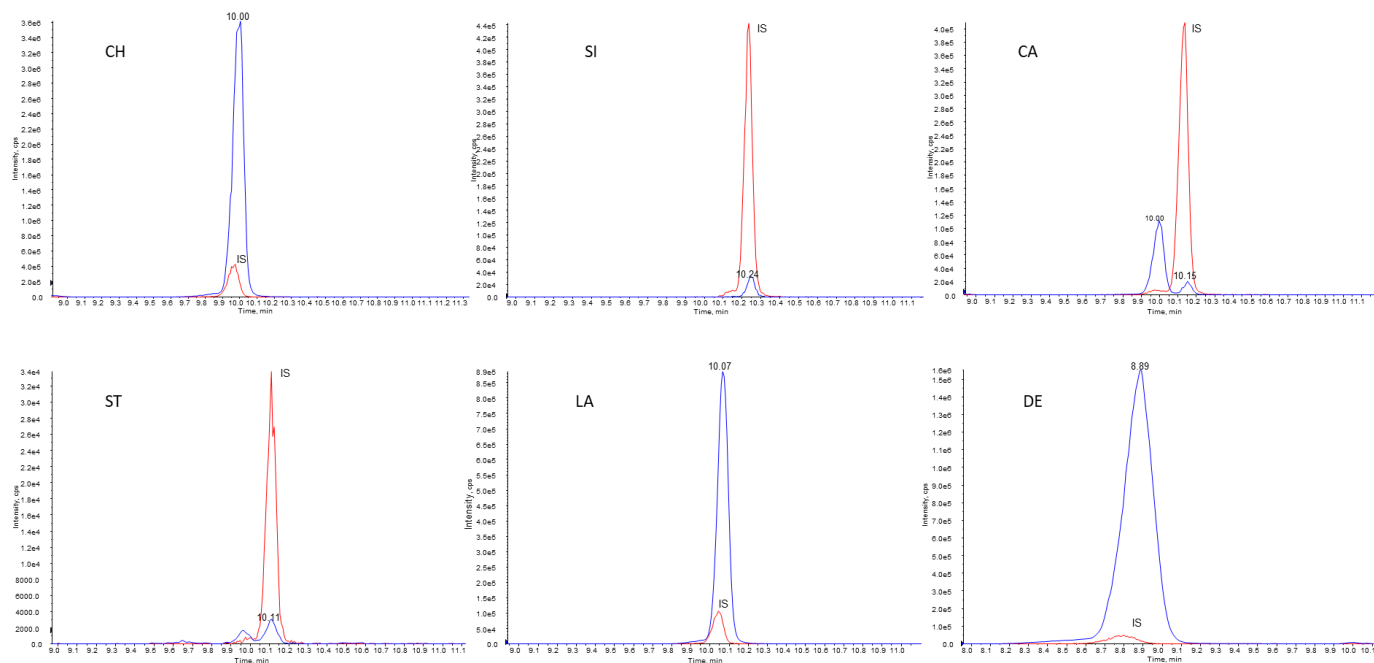

**Figure S8. Representative chromatograms of sterols in fraction 5.** Chromatograms of sterols and its internal standards are given for cholesterol (CH), sitosterol (SI), campesterol (CA), stigmasterol (ST), lanosterol (LA) and desmosterol (DE).
